# Supplementary material
Source: PubMed Central journal article supplement (PMC8073243)
Supplement: NIHMS1605145-supplement-1.pdf [file NIHMS1605145-supplement-1.pdf]

**Supplementary Information**  
**A framework for supervised enhancer prediction with epigenetic pattern  
recognition and targeted validation across organisms**

**Methods**

**Whole-genome prediction of regulatory regions in H1-hESC**

To predict enhancers and promoters on the whole genome, we utilized the six-parameter machine learning model shown in Figure 2. The histone and DHS signals from the ENCODE consortium [1] were used to predict enhancers and promoters in H1-hESCs. The histone signals were converted to log-fold enrichment (with respect to control signal) before we scanned it with the matched filter. There were 43,463 active regulatory regions predicted in the human genome (< 2% of genome). All regions within 2kb of any TSS were annotated as promoters, and active regulatory regions that were more than 2kb from any TSS were annotated as enhancers. The distribution of the expression of the closest gene (GENCODE v19 TSS [2]) from the ENCODE RNA-seq dataset for H1-hESCs was compared to the expression of all genes from H1-hESCs. The Wilcoxon test was used to measure the significance of changes in gene expression.

**Transgenic mouse enhancer assay**

The representative transgenic embryo images for enhancers that displayed reproducible activity are summarized in Supplementary Figure S9. Experimental results are also summarized in Supplementary Tables 4-9, where element numbers are the unique identifiers from the VISTA Enhancer Browser ([www.enhancer.lbl.gov](http://www.enhancer.lbl.gov)). Details and raw embryo images for each tested element can be found on the browser using the genome coordinate.

All animal work was reviewed and approved by the Lawrence Berkeley National Laboratory Animal Welfare Committee. All mice used in this study were housed at the Animal Care Facility (the ACF) at LBNL. Mice were monitored daily for food and water intake, and animals were inspected weekly by the Chair of the Animal Welfare and Research Committee and the head of the animal facility in consultation with the veterinary staff. The LBNL ACF is accredited by the American Association for the Accreditation of Laboratory Animal Care International.

**Assessment with mESC FIREWACH assay peaks**

In Supplementary Figure S10, the promoters are defined as FIREWACH peaks within 2kb of any TSS (GENCODE release vM4 [3]); enhancers were defined as FIREWACH peaks more than 2kb from any TSS. The larger distance (2kb) for defining promoters was used because of the larger size of the mouse genome. The FIREWACH assay was performed in a transduction assay and was based on CHIP-seq peaks of a few key TFs. Hence, we did not split the FIREWACH peaks into active and poised enhancers and promoters. The ENCODE histone and DHS datasets for mESCs were used to predict enhancers and promoters.

## Enhancer validation experiment

### Cell lines

WA01 or H1-hESCs were obtained from WiCell and maintained feeder free on matrigel-coated plates in mTESR1 medium (StemCell Technologies) supplemented with penicillin and streptomycin. All human cell line experiments were conducted in compliance with relevant ethical regulations. Roughly once weekly cell colonies were dissociated using dispase, and absence of differentiation was confirmed by visual inspection and periodically staining cells using anti-SSEA4 conjugated to FITC and by performing flow cytometry. Other cell types (HOS and A549 obtained from ATCC and TZM-bl from the AIDS Reagent Repository) were maintained in DMEM supplemented with 10% fetal calf serum and passaged twice weekly using trypsin-EDTA.

### Preparation of HIV vector, cellular transduction, and analysis

Self-inactivating (SIN) HIV vector pFG12 was modified in that the UBC promoter driving eGFP along with the WPRE was removed and replaced with a 1.4 kb IRES-eGFP cassette. Upstream of the IRES, a 142 bp basal Oct 4 promoter (5'-CCTCCCTCTCCTCCACCCATCCAGGGGGCGGGGCCAGAGGTCAAGGCTAGTGGG TGGGACTGGGGAGGGAGAGAGGGGTTGAGTAGTCCCTTCGCAAGCCCTCATTTCAC CAGGCCCGGCTTGGGGCGCCTTCCTTCCCC-3'; coordinates on chromosome 6, negative strand: 31138398-31138539) was inserted, which overlaps with the TSS of *Oct4* but not with the coding sequence. A unique Xba 1 site was present just upstream of the basal Oct4 promoter, used for cloning of test insert DNA fragments. Each test DNA fragment was amplified from genomic DNA using nested PCR and Takara LA enzyme. Typical initial PCR amplification conditions were 98°C for 10 s, 55°C for 15 s, and 68°C for 3 min for 30 cycles using 100-200 ng of genomic DNA, with the annealing temperature being variable, depending upon the  $T_m$  of the primer pair. For the second (internal) round of PCR, only 1-2% of the original product was used under similar PCR conditions, but for 15 cycles.

PCR products were individually cloned into TOPO pCRII-blunt vector (Invitrogen) and insert identity was confirmed by both restriction digests and dideoxy sequencing. All DNA inserts were cloned into the unique Xba 1 site of the HIV vector described above using compatible cohesive ends, and in each case both orientations of the insert within the vector were confirmed by appropriate restriction digests.

HIV vector supernatants were prepared by co-transfecting 35 mm tissue culture wells of 293T cells (~75-80% confluence), each with 5 µg of HIV transfer vector (HIV-TV) with the DNA element of interest, HIV packaging vector, and pME VSV G (encoding Indiana strain VSV G). After 48-72 hours, vector supernatant was harvested, centrifuged at 3000 x g for 10 min, and stored at -80°C until use.

In order to transduce the WA01 hESCs, cells were first lifted using dispase, washed extensively, and plated in the presence of ROCK Inhibitor Y-27632 (StemCell Technologies) on matrigel-coated plates. After a few hours, cells were transduced for 4-6 h with lentiviral vector supernatant. After 48-72 h single cell suspensions were again

prepared using dispase and Y-27632 and cells were analyzed for eGFP expression by flow cytometry, collecting 10,000 events. For all other cell lines, cells were plated the day before in a 12-well format, transduced using the indicated amounts of vector supernatant, refed the following day, and analyzed for eGFP expression 48-72 h later, as described above.

The activity of each element was assessed by flow cytometric readout of eGFP expression 48-72h after transduction. All readouts were recorded as fold changes normalized to the empty SIN HIV vector transduction control. The mean fold change of each tested element in each direction is detailed in the extended table, where 0 occurred when the number of positive cells was less than that of the negative control according to flow cytometric gating. The experimental results are also plotted in Supplementary Figures S12 and S13.

We calculated the log fold changes of each replicate. Then, for each element in each direction, we calculated the mean log fold changes as well as the standard deviations. We used t-distribution to test if insertion of one element incur significantly positive log fold changes ( $p < 0.05$ ). The t-distribution is used as a more stringent test for data from normal distribution but of small sample sizes. This was done for both forward and reverse orientations separately and elements that were positive in either orientation were considered to be active. Based on this criteria, we did the calculations in each human cell line.

### **Code availability**

Source code with detailed description of our model is distributed through our website <https://goo.gl/E8fLNN>. We also provided a dockerized image at this site that can be directly downloaded to work in different platforms. In addition, the dataset that we used to train our model is available at the website under the *Training* directory. The metaprofiles for the model is under the *Metaprofile* directory. To test the tool, use the datasets provided in the *sample* directory along with the instructions in the README file. We have also put the genome-wide predictions of regulatory elements in different mouse tissues and human cell lines under the directory *Predicted-Regulatory-Elements*.

**Supplementary Table 1 – Performance of matched filter models with single epigenetic feature.** The performance of matched filter models from different epigenetic marks for predicting regulatory regions are compared using AUROC and AUPR. The data STARR-seq experiments using multiple core promoters were used to train each matched filter. Due to imbalance in real datasets (more negatives than positives), the performance was compared on data with negatives being 10 times more than positives.

| Feature  | AUROC | AUPR |
|----------|-------|------|
| H3K27ac  | 0.95  | 0.80 |
| H3K4me1  | 0.70  | 0.56 |
| H3K4me2  | 0.90  | 0.73 |
| H3K4me3  | 0.82  | 0.71 |
| H3K9ac   | 0.92  | 0.82 |
| H4K12ac  | 0.86  | 0.69 |
| H3       | 0.78  | 0.64 |
| H1       | 0.84  | 0.71 |
| H2BK5ac  | 0.89  | 0.76 |
| H4K8ac   | 0.81  | 0.61 |
| H4K5ac   | 0.81  | 0.63 |
| H4K16ac  | 0.87  | 0.74 |
| H3K18ac  | 0.84  | 0.68 |
| H3K9me1  | 0.69  | 0.55 |
| H3K79me2 | 0.73  | 0.49 |
| H3K27me2 | 0.76  | 0.58 |
| H2Av     | 0.60  | 0.45 |
| H3K27me3 | 0.77  | 0.56 |
| H3K23ac  | 0.65  | 0.44 |
| H3K79me3 | 0.66  | 0.46 |
| H3K27me1 | 0.58  | 0.36 |
| H4       | 0.69  | 0.49 |
| H3K36me1 | 0.50  | 0.35 |
| H3K9me3  | 0.60  | 0.43 |
| H3K9me2  | 0.61  | 0.41 |
| H3K36me3 | 0.54  | 0.34 |
| H4K20me1 | 0.44  | 0.29 |

|          |      |      |
|----------|------|------|
| H3K79me1 | 0.47 | 0.30 |
| DHS      | 0.88 | 0.79 |

**Supplementary Table 2 – Performance of matched filter models with single epigenetic feature for predicting promoters and enhancers.** The performance of matched filter models from different epigenetic marks for predicting enhancers and promoters are compared using AUROC and AUPR. The data STARR-seq experiments using multiple core promoters were used to train each matched filter. Due to imbalance in real datasets (more negatives than positives), the performance was compared on data with negatives being 10 times more than positives. The numbers within (outside) parentheses refer to the accuracy of models for predicting promoters (enhancers).

| Feature  | AUROC       | AUPR        |
|----------|-------------|-------------|
| H3K27ac  | 0.91 (0.96) | 0.60 (0.73) |
| H3K4me1  | 0.88 (0.60) | 0.42 (0.16) |
| H3K4me2  | 0.84 (0.92) | 0.21 (0.48) |
| H3K4me3  | 0.62 (0.92) | 0.09 (0.65) |
| H3K9ac   | 0.85 (0.94) | 0.24 (0.70) |
| H4K12ac  | 0.90 (0.93) | 0.33 (0.58) |
| H3       | 0.78 (0.83) | 0.26 (0.48) |
| H1       | 0.83 (0.92) | 0.36 (0.61) |
| H2BK5ac  | 0.91 (0.96) | 0.59 (0.70) |
| H4K8ac   | 0.90 (0.86) | 0.55 (0.37) |
| H4K5ac   | 0.89 (0.86) | 0.52 (0.41) |
| H4K16ac  | 0.90 (0.90) | 0.52 (0.40) |
| H3K18ac  | 0.90 (0.88) | 0.60 (0.47) |
| H3K9me1  | 0.53 (0.81) | 0.09 (0.44) |
| H3K79me2 | 0.70 (0.83) | 0.10 (0.27) |
| H4K27me2 | 0.68 (0.85) | 0.19 (0.44) |
| H2Av     | 0.63 (0.78) | 0.15 (0.36) |
| H3K27me3 | 0.81 (0.86) | 0.20 (0.36) |
| H3K23ac  | 0.55 (0.71) | 0.07 (0.20) |
| H3K79me3 | 0.61 (0.74) | 0.08 (0.23) |
| H3K27me1 | 0.72 (0.57) | 0.12 (0.12) |
| H4       | 0.69 (0.68) | 0.13 (0.21) |
| H3K36me1 | 0.75 (0.58) | 0.19 (0.18) |
| H3K9me3  | 0.59 (0.64) | 0.11 (0.15) |
| H3K9me2  | 0.62 (0.63) | 0.09 (0.15) |
| H3K36me3 | 0.60 (0.62) | 0.09 (0.14) |

|          |             |             |
|----------|-------------|-------------|
| H4K20me1 | 0.55 (0.50) | 0.07 (0.10) |
| H3K79me1 | 0.54 (0.58) | 0.06 (0.12) |

**Supplementary Table 3 - Summary of predicted mouse regulatory regions in six different tissues.** The SVM model is used to predict enhancers in a genome wide fashion using the relevant histone marks and DNAase-Seq datasets measured in each tissue. Regions within 2 kb of a transcript (GENCODE) were labeled as proximal regulatory regions while the rest are predicted to be distal regulatory regions. The numbers within parentheses refer to the percentage of all predictions within that category.

| Tissue      | Regulatory regions | Distal regulatory regions | Proximal regulatory regions |
|-------------|--------------------|---------------------------|-----------------------------|
| Forebrain   | 35,509             | 24,423 (68.8%)            | 11,086 (31.2%)              |
| Hindbrain   | 32,855             | 22,659 (69.0%)            | 10,196 (31.0%)              |
| Limb        | 38,232             | 26,761 (70.0%)            | 11,471 (30.0%)              |
| Midbrain    | 33,451             | 22,947 (68.6%)            | 10,504 (31.4%)              |
| Heart       | 30,739             | 20,282 (66.0%)            | 10,457 (34.0%)              |
| Neural Tube | 38,933             | 27,033 (69.4%)            | 11,900 (30.6%)              |



**Supplementary Table 4 – Transgenic mouse reporter assay results for 103 top human homolog regions.** The results from the transgenic mouse assays and the regions tested are displayed. The element number refers to the label of the element in VISTA while the name refers to the label in the ENCODE database. The regions tested were predicted based on predictions in human cell lines.

| Element # | Name  | hg19 coordinates         | Result summary                    |
|-----------|-------|--------------------------|-----------------------------------|
| hs2346    | EN202 | chr4:23932061-23933692   | 8/11 eye, 5/11 facial mesenchyme  |
| hs2349    | EN205 | chr22:47048605-47050100  | Negative                          |
| hs2353    | EN209 | chr10:97267716-97269342  | 4/6 heart                         |
| hs2357    | EN214 | chr1:214280595-214282080 | 8/11 heart                        |
| hs2359    | EN216 | chr3:42113230-42114717   | Negative                          |
| hs2371    | EN228 | chr17:55618678-55620173  | Negative                          |
| hs2372    | EN229 | chr2:109252387-109254056 | Negative                          |
| hs2373    | EN230 | chr20:43201171-43202669  | Negative                          |
| hs2374    | EN231 | chr1:225954390-225955885 | 4/5 branchial arch                |
| hs2375    | EN232 | chr17:71287045-71288497  | Negative                          |
| hs2377    | EN234 | chr6:163630391-163631925 | Negative                          |
| hs2378    | EN235 | chr11:12203825-12205249  | Negative                          |
| hs2380    | EN237 | chr20:46012576-46013656  | Negative                          |
| hs2382    | EN240 | chr3:186123841-186125332 | Negative                          |
| hs2384    | EN242 | chr2:20778294-20779806   | 10/10 heart, 7/10 ear, 5/10 other |
| hs2387    | EN245 | chr7:130012949-130014460 | Negative                          |
| hs2393    | EN251 | chr20:17839843-17841338  | Negative                          |
| hs2394    | EN252 | chr6:108909808-108911282 | Negative                          |
| hs2397    | EN255 | chr6:46020500-46022001   | Negative                          |
| hs2399    | EN257 | chr6:43760764-43762277   | Negative                          |
| hs2400    | EN258 | chr21:29655315-29656764  | Negative                          |
| hs2403    | EN261 | chr11:8753701-8755208    | Negative                          |
| hs2404    | EN262 | chr1:203660971-203662806 | Negative                          |
| hs2405    | EN263 | chr6:17931980-17933492   | Negative                          |
| hs2412    | EN270 | chr4:129278773-129280245 | Negative                          |
| hs2414    | EN272 | chr4:47826466-47828052   | 5/5 heart                         |
| hs2415    | EN273 | chr22:28028233-28029715  | Negative                          |
| hs2417    | EN275 | chr4:128406285-128407745 | Negative                          |

|        |       |                        |                                                             |
|--------|-------|------------------------|-------------------------------------------------------------|
| hs2418 | EN276 | chr1:92310736-92312231 | Negative                                                    |
| hs2419 | EN277 | chr7:82039621-82041108 | 12/12 somites; 11/12 limb, 10/12 eye,<br>9/12 brachial arch |
| hs2420 | EN278 | chr10:5627988-5629809  | Negative                                                    |

**Supplementary Table 5** - Transgenic reporter assay results for 20 top tier elements of e11.5 mouse forebrain. The results from the transgenic mouse assays and the regions tested are displayed. The element number refers to the label of the element in VISTA while the name refers to the label in the ENCODE database. The regions tested were predicted based on predictions in mouse e11.5 forebrain tissue.

| Element # | Name   | mm9 coordinates           | Result summary                                                                          |
|-----------|--------|---------------------------|-----------------------------------------------------------------------------------------|
| mm1303    | mEN351 | chr10:60995425-61000401   | Negative                                                                                |
| mm1304    | mEN352 | chr15:75477139-75480138   | <b>4/7 forebrain</b>                                                                    |
| mm1305    | mEN353 | chr9:121210706-121215001  | Negative                                                                                |
| mm1332    | mEN354 | chr4:134812990-134815987  | Negative                                                                                |
| mm1306    | mEN356 | chr1:38253589-38258706    | Negative                                                                                |
| mm1333    | mEN357 | chr1:40002378-40007534    | <b>7/9 forebrain, 7/9 cranial nerve, 7/9 dorsal root ganglion</b>                       |
| mm1307    | mEN358 | chr13:34377263-34382362   | <b>3/5 forebrain, 3/5 midbrain, 3/5 hindbrain</b>                                       |
| mm1308    | mEN359 | chr4:97313903-97317906    | Negative                                                                                |
| mm1309    | mEN360 | chr11:117204339-117209430 | <b>8/8 forebrain</b>                                                                    |
| mm1310    | mEN362 | chr12:12714218-12718924   | <b>5/6 forebrain, 5/6 midbrain</b>                                                      |
| mm1311    | mEN363 | chr4:62272177-62276366    | Negative                                                                                |
| mm1328    | mEN366 | chr2:101430145-101434498  | <b>8/9 forebrain, 8/9 midbrain, 6/9 limb, 6/9 shoulder</b>                              |
| mm1312    | mEN367 | chr2:103464143-103467689  | <b>3/5 forebrain, 4/5 hindbrain</b>                                                     |
| mm1334    | mEN368 | chr13:84921377-84926070   | <b>5/10 forebrain</b>                                                                   |
| mm1329    | mEN369 | chr18:34290952-34294024   | <b>8/10 nose, 7/10 neck</b>                                                             |
| mm1313    | mEN373 | chr2:130315050-130319592  | <b>3/6 forebrain</b>                                                                    |
| mm1316    | mEN381 | chr6:93768350-93773377    | <b>4/9 forebrain, 4/9 midbrain, 4/9 hindbrain</b>                                       |
| mm1314    | mEN382 | chr6:91094557-91099332    | <b>7/7 forebrain, 7/7 midbrain, 7/7 hindbrain, 4/7 trigeminal V (ganglion, cranial)</b> |
| mm1315    | mEN383 | chr16:23502881-23507429   | <b>7/8 forebrain, 7/8 hindbrain, 4/8 neural tube</b>                                    |
| mm1317    | mEN388 | chr1:99435074-99439318    | <b>3/4 forebrain, 3/4 midbrain, 3/4 hindbrain, 3/4 neural tube</b>                      |

**Supplementary Table 6** - Transgenic reporter assay results for 22 middle tier elements of e11.5 mouse forebrain. The results from the transgenic mouse assays and the regions tested are displayed. The element number refers to the label of the element in VISTA while the name refers to the label in the ENCODE database. The regions tested were predicted based on predictions in e11.5 mouse forebrain tissue.

| Element # | Name   | mm9 coordinates           | Result summary                                                                |
|-----------|--------|---------------------------|-------------------------------------------------------------------------------|
| mm1336    | mEN391 | chr8:89675106-89678195    | <b>3/4 forebrain</b>                                                          |
| mm1338    | mEN395 | chr12:5273244-5276374     | <b>8/10 ear</b>                                                               |
| mm1339    | mEN396 | chr16:37812733-37815651   | Negative                                                                      |
| mm1340    | mEN397 | chr5:77915965-77918950    | <b>4/9 forebrain, 5/9 hindbrain, 7/9 limb</b>                                 |
| mm1364    | mEN400 | chr6:112763556-112766918  | Negative                                                                      |
| mm1365    | mEN401 | chr3:63673741-63676349    | Negative                                                                      |
| mm1341    | mEN402 | chr14:73633763-73636133   | <b>6/6 forebrain, 6/6 midbrain, 6/6 hindbrain, 6/6 limb, 3/6 blood vessel</b> |
| mm1366    | mEN403 | chr5:119115486-119118887  | Negative                                                                      |
| mm1348    | mEN405 | chr11:107623487-107625498 | <b>11/11 abdomen</b>                                                          |
| mm1367    | mEN406 | chr9:95713136-95716028    | <b>3/8 midbrain, 5/8 hindbrain, 7/8 ear</b>                                   |
| mm1368    | mEN409 | chr2:117252816-117256342  | <b>3/6 forebrain</b>                                                          |
| mm1349    | mEN410 | chr11:77738264-77741018   | Negative                                                                      |
| mm1369    | mEN411 | chr1:160195598-160198177  | <b>3/4 midbrain, 3/4 hindbrain, 3/4 neck</b>                                  |
| mm1370    | mEN412 | chr3:76269644-76273343    | <b>7/7 forebrain, 4/7 midbrain, 4/7 hindbrain</b>                             |
| mm1371    | mEN413 | chr9:13502414-13505204    | <b>6/6 Hindbrain, 3/6 neural tube</b>                                         |
| mm1372    | mEN414 | chr1:75284862-75287747    | <b>5/12 forebrain</b>                                                         |
| mm1342    | mEN415 | chr1:12993828-12996637    | Negative                                                                      |
| mm1345    | mEN420 | chr4:24144061-24147950    | Negative                                                                      |
| mm1346    | mEN421 | chr2:165845157-165848962  | <b>4/5 midbrain</b>                                                           |
| mm1375    | mEN424 | chr2:168518619-168521392  | <b>4/5 hindbrain, 3/5 neural tube</b>                                         |
| mm1376    | mEN425 | chr13:12594345-12597146   | <b>4/5 forebrain, 4/5 midbrain, 4/5 hindbrain, 4/5 eye, 4/5 neural tube</b>   |
| mm1347    | mEN429 | chrX:96761917-96764647    | <b>5/8 midbrain</b>                                                           |

**Supplementary Table 7 - Transgenic reporter assay results for 20 bottom tier elements of e11.5 mouse forebrain.** The results from the transgenic mouse assays and the regions tested are displayed. The element number refers to the label of the element in VISTA while the name refers to the label in the ENCODE database. The regions tested were predicted based on predictions in e11.5 mouse forebrain tissue.

| Element # | Name   | mm9 coordinates          | Result summary                                                                                                      |
|-----------|--------|--------------------------|---------------------------------------------------------------------------------------------------------------------|
| mm1389    | mEN432 | chr17:4038923-4041381    | Negative                                                                                                            |
| mm1406    | mEN439 | chr9:120511026-120513650 | <b>5/8 midbrain</b>                                                                                                 |
| mm1391    | mEN440 | chr2:132252190-132254838 | <b>5/5 forebrain, 4/5 nose, 3/5 heart</b>                                                                           |
| mm1398    | mEN442 | chr5:99701432-99704258   | Negative                                                                                                            |
| mm1392    | mEN444 | chr3:97896495-97899340   | Negative                                                                                                            |
| mm1401    | mEN445 | chr7:142329604-142332301 | <b>3/4 forebrain, 3/4 midbrain</b>                                                                                  |
| mm1393    | mEN448 | chr12:80896781-80899359  | <b>5/7 blood vessels</b>                                                                                            |
| mm1386    | mEN451 | chr6:114752658-114755344 | Negative                                                                                                            |
| mm1394    | mEN453 | chr8:118687658-118690168 | <b>4/7 facial mesenchyme,<br/>6/7 hindbrain, 7/7 neural tube</b>                                                    |
| mm1402    | mEN454 | chr2:170661658-170664941 | <b>6/12 heart</b>                                                                                                   |
| mm1403    | mEN456 | chr13:39972062-39974802  | <b>6/6 forebrain, 5/6 facial mesenchyme,<br/>6/6 neural tube,<br/>5/6 midbrain, 6/6 hindbrain</b>                   |
| mm1390    | mEN458 | chr18:69706161-69709018  | Negative                                                                                                            |
| mm1395    | mEN462 | chrX:22474415-22477133   | <b>10/11 forebrain, 10/11 neural tube</b>                                                                           |
| mm1388    | mEN463 | chr3:51711493-51714567   | <b>7/8 forebrain, 7/8 hindbrain, 7/8 eye,<br/>7/8 midbrain, 6/8 heart, 5/8 ear, 5/8<br/>nose, 5/8 brancial arch</b> |
| mm1396    | mEN464 | chr7:6803218-6806107     | Negative                                                                                                            |
| mm1397    | mEN465 | chr7:83582528-83585249   | <b>3/5 forebrain</b>                                                                                                |
| mm1399    | mEN466 | chrX:99180954-99183481   | Negative                                                                                                            |
| mm1387    | mEN467 | chr4:131588028-131592067 | <b>4/5 forebrain</b>                                                                                                |
| mm1405    | mEN468 | chr7:141869653-141872185 | Negative                                                                                                            |
| mm1400    | mEN469 | chr15:30441205-30443717  | <b>5/7 Trigeminal V (ganglion, cranial),<br/>5/7 tail</b>                                                           |

**Supplementary Table 8** - Transgenic reporter assay results for 20 top tier elements of e11.5 mouse heart. The results from the transgenic mouse assays and the regions tested are displayed. The element number refers to the label of the element in VISTA while the name refers to the label in the ENCODE database. The regions tested were predicted based on predictions e11.5 mouse heart tissue.

| Element # | Name   | mm9 coordinates          | Result summary                           |
|-----------|--------|--------------------------|------------------------------------------|
| mm1318    | mEN472 | chr6:50304038-50307302   | Negative                                 |
| mm1319    | mEN473 | chr18:5185220-5188223    | Negative                                 |
| mm1330    | mEN474 | chr13:68710011-68714227  | <b>5/7 heart, 3/7 abdomen</b>            |
| mm1320    | mEN475 | chr7:87263494-87267152   | Negative                                 |
| mm1321    | mEN476 | chr6:39491754-39496348   | <b>3/4 heart, 3/4 nose, 3/4 shoulder</b> |
| mm1352    | mEN478 | chr16:32852130-32856370  | <b>9/9 heart</b>                         |
| mm1353    | mEN480 | chr6:145403783-145408604 | Negative                                 |
| mm1322    | mEN481 | chr18:65673857-65677447  | <b>5/6 midbrain</b>                      |
| mm1323    | mEN484 | chr11:98762967-98767955  | <b>5/7 abdomen</b>                       |
| mm1324    | mEN485 | chr2:84358122-84360960   | <b>6/10 abdomen</b>                      |
| mm1331    | mEN487 | chr18:61508433-61511882  | Negative                                 |
| mm1335    | mEN488 | chr8:81264247-81267464   | <b>4/8 heart, 4/8 branchial arch</b>     |
| mm1337    | mEN489 | chr9:40879715-40882950   | <b>3/6 liver</b>                         |
| mm1354    | mEN492 | chr2:33696983-33701358   | Negative                                 |
| mm1355    | mEN495 | chr1:75401691-75406385   | Negative                                 |
| mm1343    | mEN499 | chr11:54692427-54697431  | <b>4/4 heart</b>                         |
| mm1344    | mEN500 | chr4:57549003-57553035   | <b>5/6 heart</b>                         |
| mm1325    | mEN502 | chr2:30860459-30863597   | Negative                                 |
| mm1326    | mEN509 | chr17:30685485-30689495  | <b>4/5 heart</b>                         |
| mm1327    | mEN510 | chr3:121438015-121440547 | Negative                                 |

**Supplementary Table 9** - Transgenic reporter assay results for 20 middle tier elements of e11.5 mouse heart. The results from the transgenic mouse assays and the regions tested are displayed. The element number refers to the label of the element in VISTA while the name refers to the label in the ENCODE database. The regions tested were predicted based on predictions in e11.5 mouse heart tissue.

| element # | Name   | mm9 coordinates           | Result summary                                               |
|-----------|--------|---------------------------|--------------------------------------------------------------|
| mm1350    | mEN514 | chr18:39388954-39391193   | Negative                                                     |
| mm1407    | mEN515 | chr7:116850326-116855192  | <b>5/6 heart, 6/6 somite</b>                                 |
| mm1351    | mEN518 | chr19:53485525-53487959   | <b>7/9 facial mesenchyme, 5/6 ear</b>                        |
| mm1377    | mEN521 | chr2:156639496-156642147  | <b>3/5 somite</b>                                            |
| mm1356    | mEN524 | chr5:102395744-102399405  | Negative                                                     |
| mm1378    | mEN526 | chr9:21360965-21364026    | Negative                                                     |
| mm1357    | mEN527 | chr1:31158444-31161289    | Negative                                                     |
| mm1381    | mEN528 | chr19:10734265-10738378   | Negative                                                     |
| mm1358    | mEN530 | chr1:68825903-68828605    | Negative                                                     |
| mm1379    | mEN531 | chr7:35050573-35054815    | <b>8/9 heart, 8/9 limb, 4/9 eye</b>                          |
| mm1380    | mEN532 | chr2:44909457-44913512    | Negative                                                     |
| mm1382    | mEN534 | chr10:69105930-69109995   | Negative                                                     |
| mm1359    | mEN535 | chr12:81069617-81072879   | <b>4/9 heart, 8/9 branchial arch, 5/9 abdomen</b>            |
| mm1360    | mEN536 | chr3:121735128-121737942  | Negative                                                     |
| mm1361    | mEN539 | chr16:37892230-37895304   | <b>7/9 heart, 8/9 forebrain, 9/9 limb, 5/9 blood vessels</b> |
| mm1384    | mEN543 | chr11:102911136-102914616 | Negative                                                     |
| mm1383    | mEN545 | chr6:50286189-50288925    | Negative                                                     |
| mm1362    | mEN546 | chr8:11356668-11359383    | Negative                                                     |
| mm1363    | mEN548 | chr1:129651379-129655643  | Negative                                                     |
| mm1385    | mEN549 | chr8:92516582-92519349    | <b>3/5 heart</b>                                             |

**Supplementary Table 10 - Validation results for 20 putative enhancers in four different cell lines.** The results from the enhancer validation assay for 20 putative enhancers in four different cell lines are displayed. The activity in different cell lines is also labeled.

| Region                    | H1-hESC         | HOS             | A549            | TZM-bl          |
|---------------------------|-----------------|-----------------|-----------------|-----------------|
| chr1:1953310-192546069    | <b>Positive</b> | <b>Positive</b> | <b>Positive</b> | <b>Positive</b> |
| chr2:231809337-231809988  | Non-positive    | <b>Positive</b> | Non-positive    | <b>Positive</b> |
| chr11:65679112-61679919   | <b>Positive</b> | <b>Positive</b> | Non-positive    | <b>Positive</b> |
| chr12:125039037-125040700 | <b>Positive</b> | <b>Positive</b> | Non-positive    | <b>Positive</b> |
| chr13:113921562-113922944 | <b>Positive</b> | <b>Positive</b> | Non-positive    | <b>Positive</b> |
| chr14:77422602-77423265   | <b>Positive</b> | <b>Positive</b> | Non-positive    | Non-positive    |
| chr17:2929462-2930394     | Non-positive    | Non-positive    | Non-positive    | Non-positive    |
| chr22:31662162-31663116   | Non-positive    | <b>Positive</b> | <b>Positive</b> | Non-positive    |
| chr1:54839458-54841157    | <b>Positive</b> | Non-positive    | Non-positive    | Non-positive    |
| chr3:128150669-128152511  | <b>Positive</b> | Non-positive    | Non-positive    | Non-positive    |
| chr4:6246837-6247511      | <b>Positive</b> | Non-positive    | Non-positive    | Non-positive    |
| chr7:1956626-1958036      | <b>Positive</b> | Non-positive    | Non-positive    | Non-positive    |
| chr7:73448387-73448811    | <b>Positive</b> | Non-positive    | <b>Positive</b> | Non-positive    |
| chr9:132976212-132977003  | <b>Positive</b> | Non-positive    | Non-positive    | Non-positive    |
| chr9:138892812-1338893419 | Non-positive    | Non-positive    | Non-positive    | Non-positive    |
| chr11:44307337-44308437   | Non-positive    | Non-positive    | Non-positive    | Non-positive    |
| chr12:52536500-52539000   | Non-positive    | Non-positive    | Non-positive    | Non-positive    |
| chr13:24121112-24121886   | Non-positive    | <b>Positive</b> | <b>Positive</b> | Non-positive    |
| chr14:75905362-75907344   | Non-positive    | <b>Positive</b> | <b>Positive</b> | Non-positive    |
| chr18:12271615-12272169   | Non-positive    | <b>Positive</b> | <b>Positive</b> | <b>Positive</b> |
| Overall                   | <b>11/20</b>    | <b>10/20</b>    | <b>6/20</b>     | <b>6/20</b>     |



**Figures and Captions:**

A)

| Feature | AUROC | AUPR |
|---------|-------|------|
| H3K27ac | 0.81  | 0.76 |
| H3K9ac  | 0.79  | 0.70 |
| DHS     | 0.75  | 0.70 |
| H3K4me2 | 0.79  | 0.63 |
| H3K4me3 | 0.66  | 0.55 |
| H3K4me1 | 0.75  | 0.64 |

B)

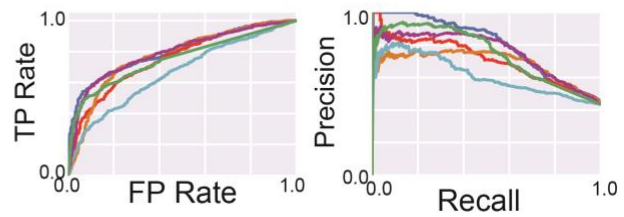

**Supplementary Material Figure 1: Training matched filter with all STARR-seq peaks.** All STARR-seq peaks without filtering were used in the tenfold cross validation. Following the same procedure, metaprofiles were created on the training data and the matched filter scores are evaluated on the remaining test dataset. A) The performance of each epigenetic mark on all STARR-seq peaks assessed by AUROC and AUPR is shown in the table. B) The ROC and PR curves of each feature are plotted in their corresponding colors.

A)

| Model            | AUROC | AUPR |
|------------------|-------|------|
| Ridge Regression | 0.84  | 0.79 |
| Naive Bayes      | 0.82  | 0.77 |
| Random Forest    | 0.85  | 0.80 |
| Linear SVM       | 0.85  | 0.80 |

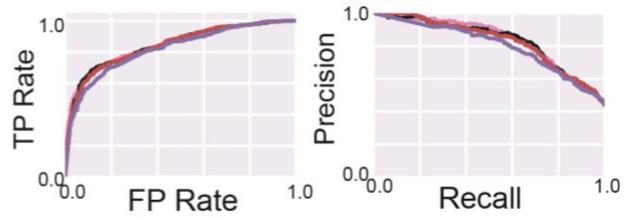

B) Importance of Feature in Random Forest

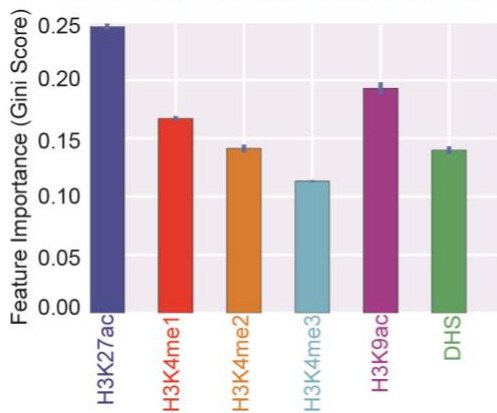

Coefficients in Linear SVM

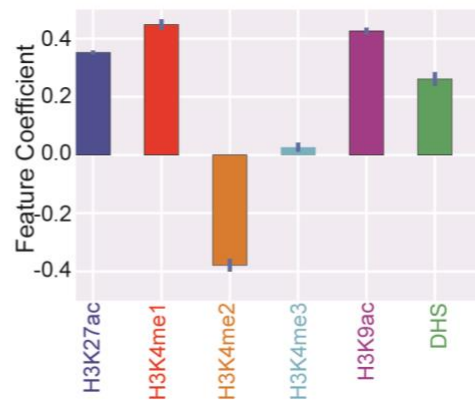

**Supplementary Material Figure 2: Training matched filter with all STARR-seq peaks.** The integrated models were trained on all STARR-seq peaks and evaluated by ten-fold cross-validations. A) The performances of the integrated models trained on all STARR-seq peaks are shown, with the ROC and PR curves of each model plotted in their corresponding colors. B) The importance of each feature (measured by the Gini score and the feature coefficient) in the integrated models is shown. Error bars show the standard deviations in the ten-fold cross-validations.

A)

| Feature          | AUROC       | AUPR        |
|------------------|-------------|-------------|
| H3K27ac          | 0.88 (0.94) | 0.78 (0.87) |
| H3K9ac           | 0.86 (0.94) | 0.56 (0.86) |
| H3K4me2          | 0.84 (0.92) | 0.53 (0.79) |
| H3K4me3          | 0.58 (0.91) | 0.28 (0.84) |
| H3K4me1          | 0.89 (0.58) | 0.74 (0.44) |
| Random Forest    | 0.91 (0.94) | 0.81 (0.90) |
| Ridge Regression | 0.93 (0.96) | 0.84 (0.90) |
| Linear SVM       | 0.92 (0.95) | 0.84 (0.90) |
| Naive Bayes      | 0.92 (0.96) | 0.82 (0.91) |

B)

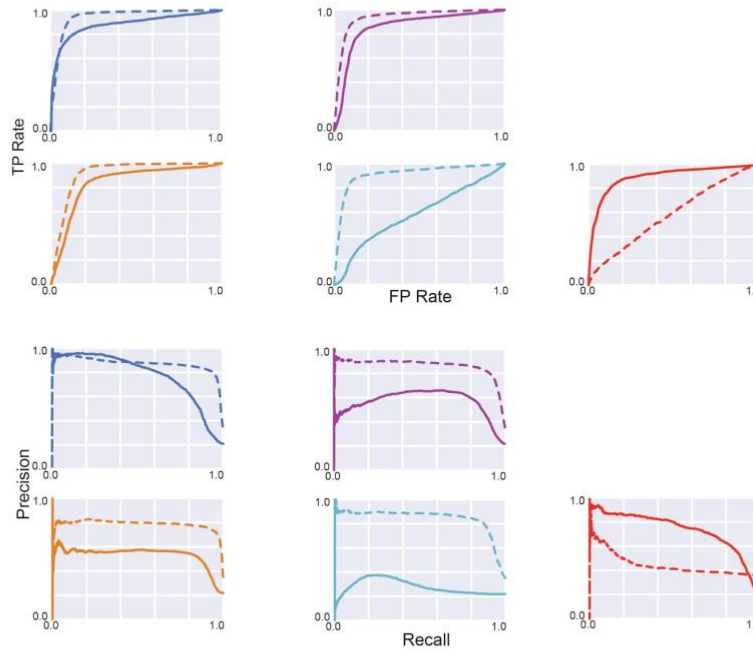

C)

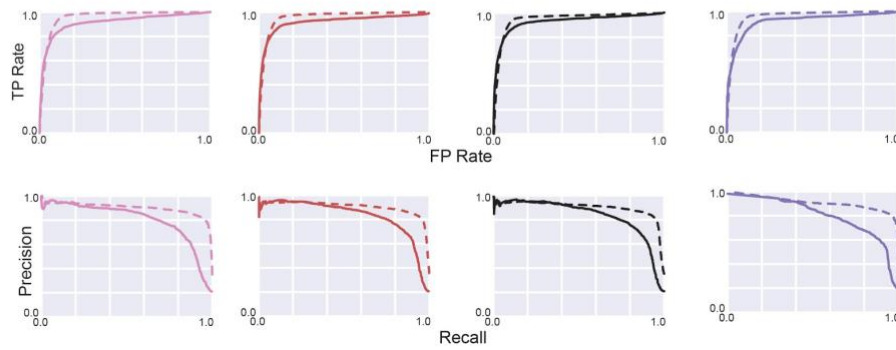

**Supplementary Material Figure 3: Transferability of models across cell lines.** The performance of the BG3-trained matched filters of different epigenetic marks and statistical models for predicting active promoters and enhancers were compared. A) The AUROC and AUPR for each matched filter and statistical model are tabulated. The individual ROC and PR curves for B) each matched filter and C) each statistical model are shown.

A)

| Feature          | AUROC | AUPR |
|------------------|-------|------|
| H3K27ac          | 0.94  | 0.92 |
| H3K9ac           | 0.93  | 0.92 |
| DHS              | 0.89  | 0.89 |
| H3K4me2          | 0.91  | 0.87 |
| H3K4me3          | 0.91  | 0.90 |
| H3K4me1          | 0.57  | 0.59 |
| Random Forest    | 0.85  | 0.84 |
| Ridge Regression | 0.82  | 0.80 |
| Linear SVM       | 0.79  | 0.80 |
| Naive Bayes      | 0.95  | 0.93 |

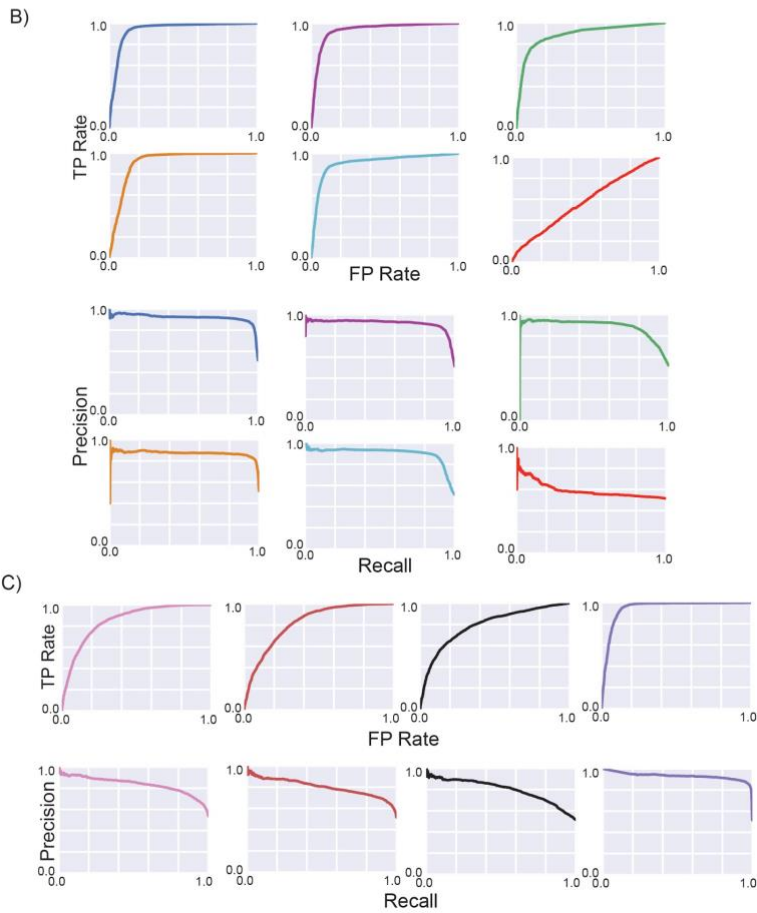

**Supplementary Material Figure 4: Accuracy of enhancer-trained matched filter and statistical models for promoter prediction.** The performance of the enhancer-trained matched filters of different epigenetic marks and statistical models for predicting active promoters was compared. A) The AUROC and AUPR for each matched filter and statistical model were tabulated. The individual ROC and PR curves for each matched filter (B) and each statistical model (C) are shown.

A)

| Feature          | AUROC | AUPR |
|------------------|-------|------|
| H3K27ac          | 0.88  | 0.86 |
| H3K9ac           | 0.86  | 0.73 |
| DHS              | 0.82  | 0.77 |
| H3K4me2          | 0.83  | 0.70 |
| H3K4me3          | 0.58  | 0.46 |
| H3K4me1          | 0.89  | 0.83 |
| Random Forest    | 0.91  | 0.82 |
| Ridge Regression | 0.89  | 0.80 |
| Linear SVM       | 0.90  | 0.86 |
| Naive Bayes      | 0.88  | 0.83 |

B)

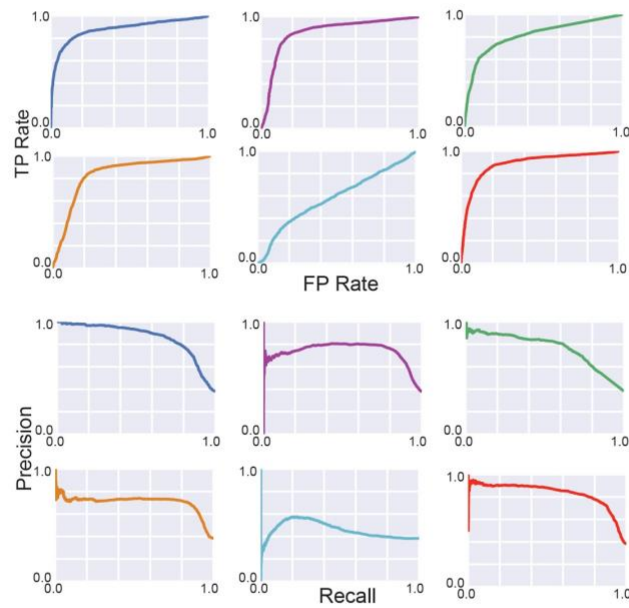

C)

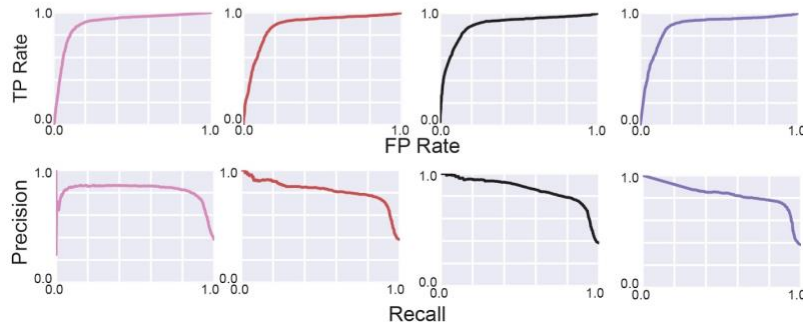

**Supplementary Material Figure 5: Accuracy of promoter-trained matched filter and statistical models for enhancer prediction.** The performance of the promoter-trained matched filters of different epigenetic marks and statistical models for predicting active enhancers was compared. A) The AUROC and AUPR for each matched filter and statistical model are tabulated. The individual ROC and PR curves for each matched filter (B) and each statistical model (C) are shown.

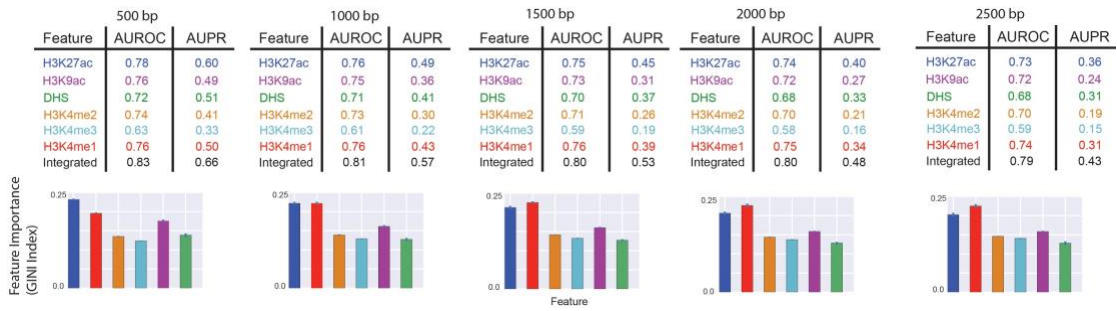

**Supplementary Material Figure 6. Accuracy of matched filter predicting enhancers using different distance cutoffs.** The STARR-seq peaks are divided into promoters and enhancer by their distance to the nearest TSS. Using varying cutoff of the distance, from 500bp to 2,500bp, performance of each epigenetic mark and the integrated model is shown in the table. The bar plot below each table shows the feature coefficient of each epigenetic mark in the integrated model, with error bars showing the standard deviations of the weights as measured from ten-fold cross-validations.

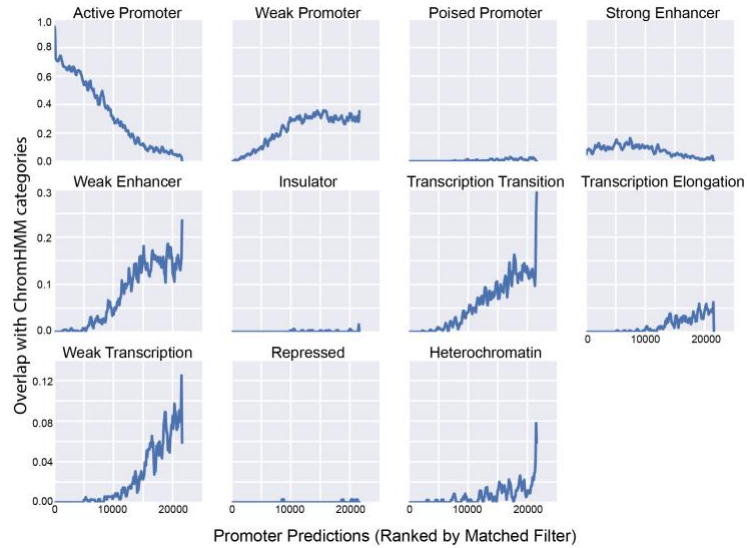

**Supplementary Material Figure 7: Overlap of predicted promoters with chromatin states predicted by ChromHMM.** The promoters predicted to be active by matched filter in the H1-hESC cell line were compared with the chromatin states predicted using chromHMM. Most of the matched filter promoters were also predicted to be either strong or weak promoters by chromHMM, whereas some of the other matched filter promoters were labeled as weak enhancers or transcription-related elements in chromHMM. Very few inactive regions and insulators were predicted to be promoters by matched filter. Note that the boundaries of the elements can be very different as chromHMM promoters can be tens of kilobases in length.

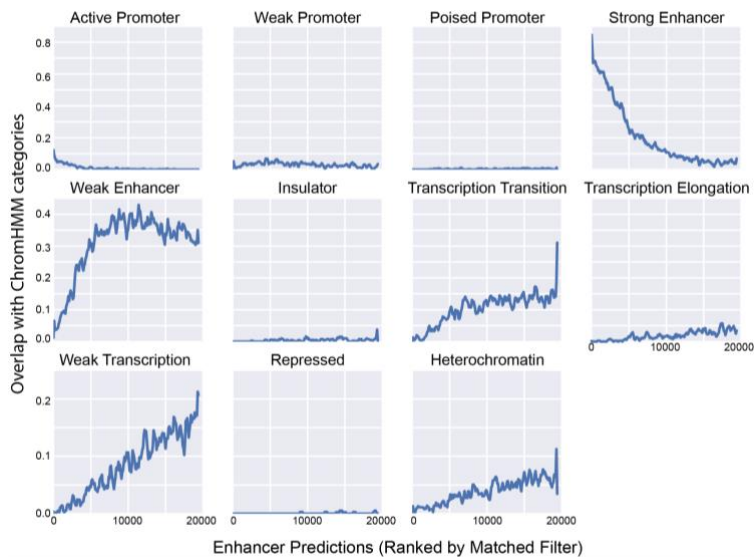

**Supplementary Material Figure 8: Overlap of predicted enhancers with chromatin states predicted by ChromHMM.** The enhancers predicted to be active by matched filter in the H1-hESC cell line were compared with the chromatin states predicted using chromHMM. Most of the matched filter enhancers were also predicted to be either strong or weak enhancers by chromHMM, whereas some of the other matched filter enhancers were labeled as transcription-related elements in chromHMM. Very few inactive regions and insulators were predicted to be enhancers by matched filter.



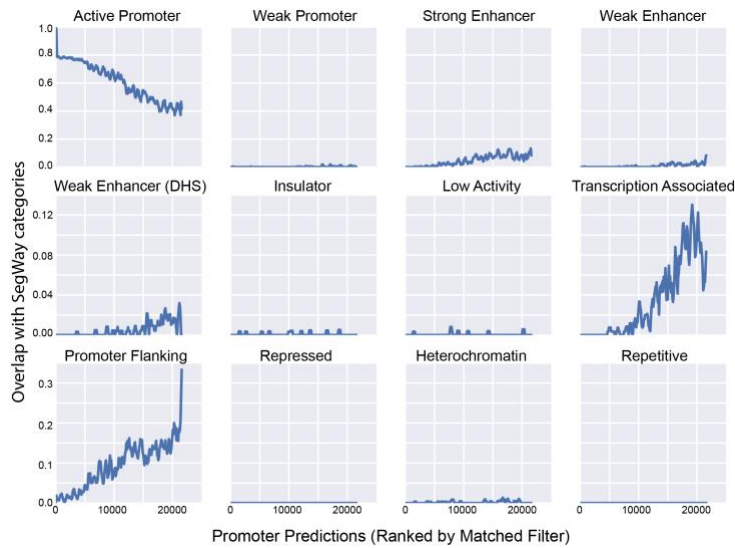

**Supplementary Material Figure 9: Overlap of predicted promoters with chromatin states predicted by Segway.** The promoters predicted to be active by matched filter in the H1-hESC cell line were compared with the chromatin states predicted using Segway. Most of the matched filter promoters were also predicted to be either active promoters by Segway, whereas some of the other matched filter promoters were labeled as promoter-flanking or transcription-related elements in Segway. Very few inactive regions and insulators were predicted to be promoters by matched filter. Note that the boundaries of the elements can be very different.

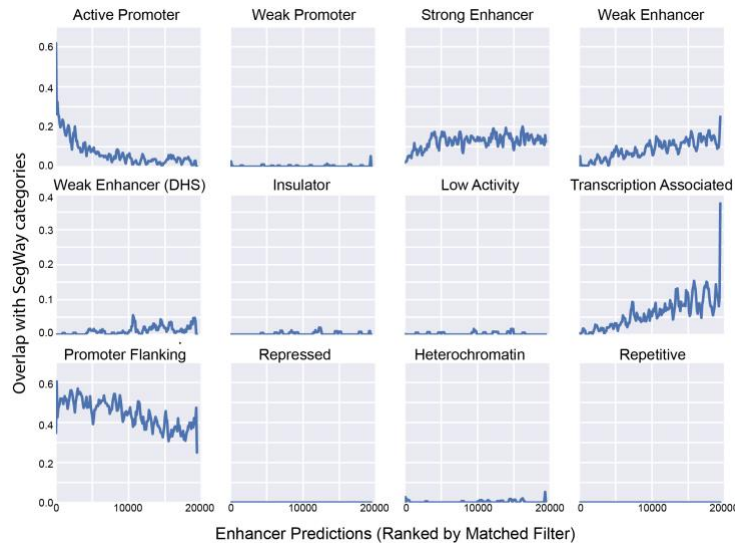

**Supplementary Material Figure 10: Overlap of predicted enhancers with chromatin states predicted by Segway.** The enhancers predicted to be active by matched filter in the H1-hESC cell line were compared with the chromatin states predicted using Segway. Most of the matched filter enhancers were also predicted to be promoters or enhancers by Segway, whereas some of the other matched filter enhancers were labeled as either promoter-flanking or transcription-related elements in Segway. Very few inactive regions and insulators were predicted to be enhancers by matched filter.



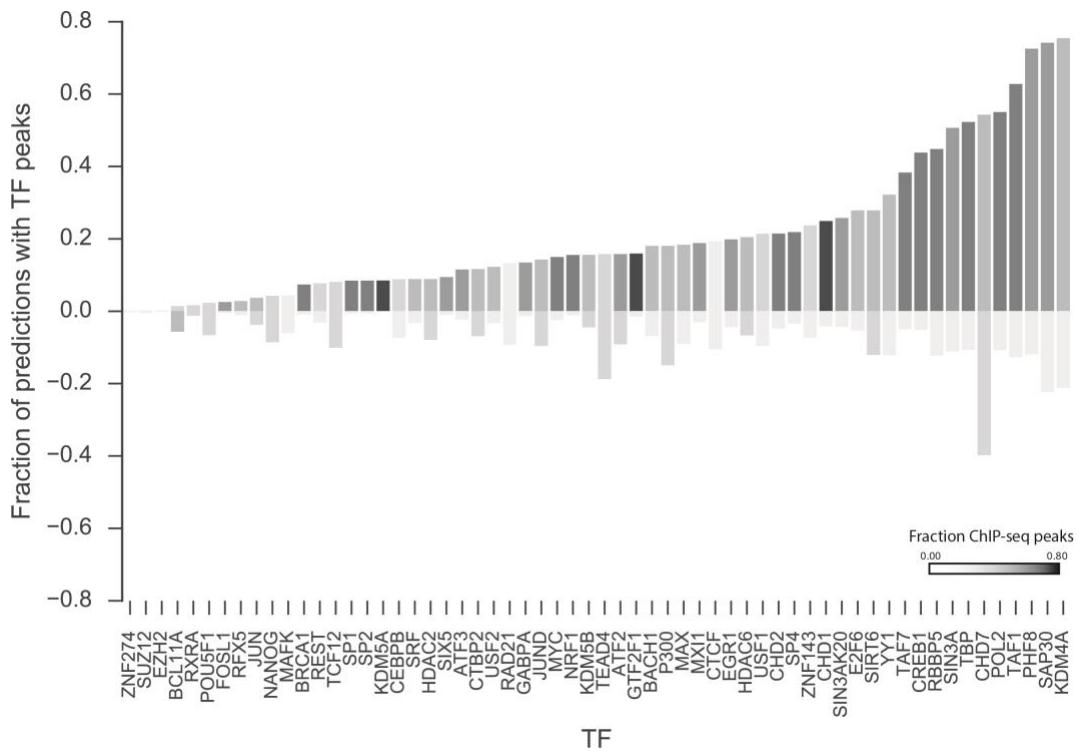

**Supplementary Material Figure 11: Overlap of TF binding site with predicted promoters/enhancers.** The fractions of promoters and enhancers that overlapped with different TF ChIP-seq peaks in H1-hESCs are plotted. The different shades of the bars are plotted based on the fraction of the ChIP-seq peaks of corresponding TFs that overlapped with promoters/enhancers.

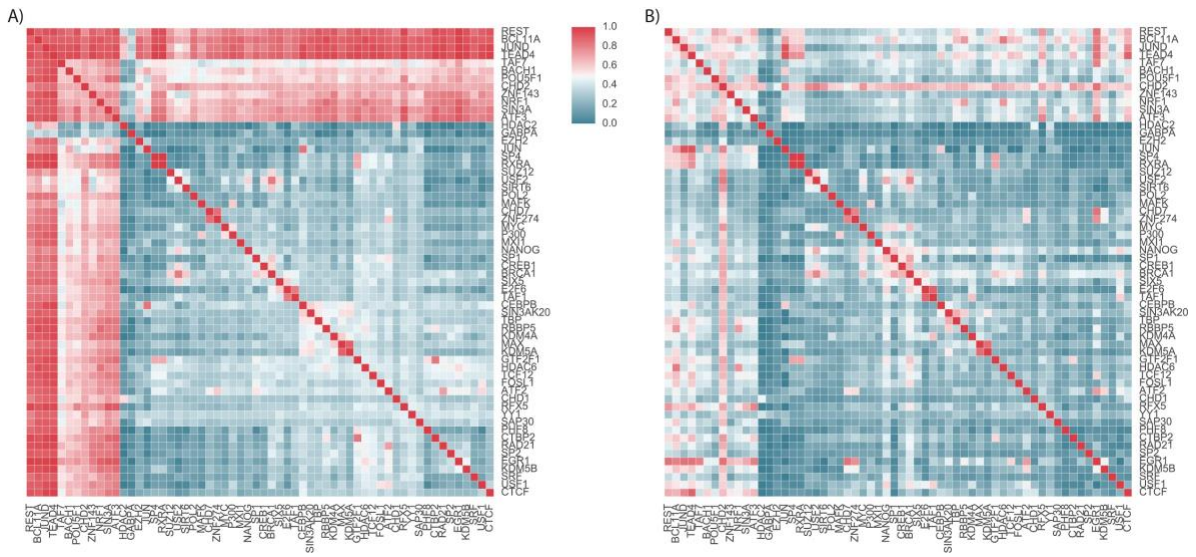

**Supplementary Material Figure 12: Patterns of co-TF binding on enhancers and promoters.** The patterns of TF co-occurrence on a single matched filter prediction around promoters (A) and enhancers (B) are plotted. The differences between co-TF binding at enhancers and promoters can be used to gain some mechanistic insight into TF cooperativity.

**References:**

1. Dunham, I., et al., *An integrated encyclopedia of DNA elements in the human genome*. Nature, 2012. **489**(7414): p. 57-74.
2. Harrow, J., et al., *GENCODE: The reference human genome annotation for The ENCODE Project*. Genome Research, 2012. **22**(9): p. 1760-1774.
3. Mudge, J.M., et al., *Creating reference gene annotation for the mouse C57BL6/J genome assembly*. Mammalian Genome, 2015. **26**(9-10): p. 366-378.
